# Supplementary material for: New Coordination Complexes Based on the 2,6-bis[1-(Phenylimino)ethyl] Pyridine Ligand: Effective Catalysts for the Synthesis of Propylene Carbonates from Carbon Dioxide and Epoxides
Source: MDPI journal article supplement (doi:10.3390/molecules23092304), 2018-09-10

# checkCIF/PLATON report

You have not supplied any structure factors. As a result the full set of tests cannot be run.

THIS REPORT IS FOR GUIDANCE ONLY. IF USED AS PART OF A REVIEW PROCEDURE FOR PUBLICATION, IT SHOULD NOT REPLACE THE EXPERTISE OF AN EXPERIENCED CRYSTALLOGRAPHIC REFEREE.

No syntax errors found.      CIF dictionary      Interpreting this report

## Datablock: xb9697\_0m

---

Bond precision:    C-C = 0.0102 Å                      Wavelength=0.71073

Cell:                      a=15.775(4)              b=15.775(4)              c=33.247(8)  
                                alpha=90              beta=90              gamma=90

Temperature:              296 K

|                | Calculated        | Reported          |
|----------------|-------------------|-------------------|
| Volume         | 8274(5)           | 8274(3)           |
| Space group    | I 41/a            | I4(1)/a           |
| Hall group     | -I 4ad            | ?                 |
| Moiety formula | C21 H19 Cl3 Cr N3 | ?                 |
| Sum formula    | C21 H19 Cl3 Cr N3 | C21 H19 Cl3 Cr N3 |
| Mr             | 471.74            | 471.74            |
| Dx,g cm-3      | 1.515             | 1.515             |
| Z              | 16                | 16                |
| Mu (mm-1)      | 0.953             | 0.953             |
| F000           | 3856.0            | 3856.0            |
| F000'          | 3869.08           |                   |
| h,k,lmax       | 18,18,39          | 18,18,39          |
| Nref           | 3688              | 3688              |
| Tmin,Tmax      | 0.743,0.875       | 0.743,0.877       |
| Tmin'          | 0.730             |                   |

Correction method= # Reported T Limits: Tmin=0.743 Tmax=0.877  
AbsCorr = NONE

Data completeness= 1.000                      Theta(max)= 25.100

R(reflections)= 0.0613( 2021)              wR2(reflections)= 0.1651( 3688)

S = 1.011                      Npar= 255

---

The following ALERTS were generated. Each ALERT has the format

**test-name\_ALERT\_alert-type\_alert-level.**

Click on the hyperlinks for more details of the test.

---

### ● Alert level C

ABSTY03\_ALERT\_1\_C The \_exptl\_absorpt\_correction\_type has been given as none.  
However values have been given for Tmin and Tmax. Remove  
these if an absorption correction has not been applied.  
From the CIF: \_exptl\_absorpt\_correction\_T\_min 0.743  
From the CIF: \_exptl\_absorpt\_correction\_T\_max 0.877  
RINTA01\_ALERT\_3\_C The value of Rint is greater than 0.12  
Rint given 0.130  
PLAT057\_ALERT\_3\_C Correction for Absorption Required RT(exp) ... 1.18 Do !  
PLAT234\_ALERT\_4\_C Large Hirshfeld Difference Cl1 --C2 0.16 Ang.  
PLAT241\_ALERT\_2\_C High 'MainMol' Ueq as Compared to Neighbors of C3 Check  
PLAT341\_ALERT\_3\_C Low Bond Precision on C-C Bonds ..... 0.01015 Ang.  
PLAT601\_ALERT\_2\_C Structure Contains Solvent Accessible VOIDS of . 42 Ang\*\*3

---

### ● Alert level G

PLAT005\_ALERT\_5\_G No Embedded Refinement Details Found in the CIF Please Do !  
PLAT020\_ALERT\_3\_G The Value of Rint is Greater Than 0.12 ..... 0.130 Report  
PLAT066\_ALERT\_1\_G Predicted and Reported Tmin&Tmax Range Identical ? Check  
PLAT083\_ALERT\_2\_G SHELXL Second Parameter in WGHT Unusually Large 15.19 Why ?  
PLAT093\_ALERT\_1\_G No s.u.'s on H-positions, Refinement Reported as mixed Check  
PLAT152\_ALERT\_1\_G The Supplied and Calc. Volume s.u. Differ by ... 2 Units  
PLAT432\_ALERT\_2\_G Short Inter X...Y Contact Cl1 ..C17 3.16 Ang.  
x,-1/2+y,-z = 14\_545 Check  
PLAT710\_ALERT\_4\_G Delete 1-2-3 or 2-3-4 Linear Torsion Angle ... # 13 Do !  
CL1 -CR1 -N2 -C8 10.00 3.00 1.555 1.555 1.555 1.555  
PLAT710\_ALERT\_4\_G Delete 1-2-3 or 2-3-4 Linear Torsion Angle ... # 18 Do !  
CL1 -CR1 -N2 -C12 -171.00 2.00 1.555 1.555 1.555 1.555  
PLAT794\_ALERT\_5\_G Tentative Bond Valency for Cr1 (III) . 3.09 Info  
PLAT899\_ALERT\_4\_G SHELXL97 is Deprecated and Succeeded by SHELXL 2018 Note

---

0 **ALERT level A** = Most likely a serious problem - resolve or explain  
0 **ALERT level B** = A potentially serious problem, consider carefully  
7 **ALERT level C** = Check. Ensure it is not caused by an omission or oversight  
11 **ALERT level G** = General information/check it is not something unexpected

4 ALERT type 1 CIF construction/syntax error, inconsistent or missing data  
4 ALERT type 2 Indicator that the structure model may be wrong or deficient  
4 ALERT type 3 Indicator that the structure quality may be low  
4 ALERT type 4 Improvement, methodology, query or suggestion  
2 ALERT type 5 Informative message, check

---

It is advisable to attempt to resolve as many as possible of the alerts in all categories. Often the minor alerts point to easily fixed oversights, errors and omissions in your CIF or refinement strategy, so attention to these fine details can be worthwhile. In order to resolve some of the more serious problems it may be necessary to carry out additional measurements or structure refinements. However, the purpose of your study may justify the reported deviations and the more serious of these should normally be commented upon in the discussion or experimental section of a paper or in the "special\_details" fields of the CIF. checkCIF was carefully designed to identify outliers and unusual parameters, but every test has its limitations and alerts that are not important in a particular case may appear. Conversely, the absence of alerts does not guarantee there are no aspects of the results needing attention. It is up to the individual to critically assess their own results and, if necessary, seek expert advice.

### **Publication of your CIF in IUCr journals**

A basic structural check has been run on your CIF. These basic checks will be run on all CIFs submitted for publication in IUCr journals (*Acta Crystallographica*, *Journal of Applied Crystallography*, *Journal of Synchrotron Radiation*); however, if you intend to submit to *Acta Crystallographica Section C* or *E* or *IUCrData*, you should make sure that full publication checks are run on the final version of your CIF prior to submission.

### **Publication of your CIF in other journals**

Please refer to the *Notes for Authors* of the relevant journal for any special instructions relating to CIF submission.

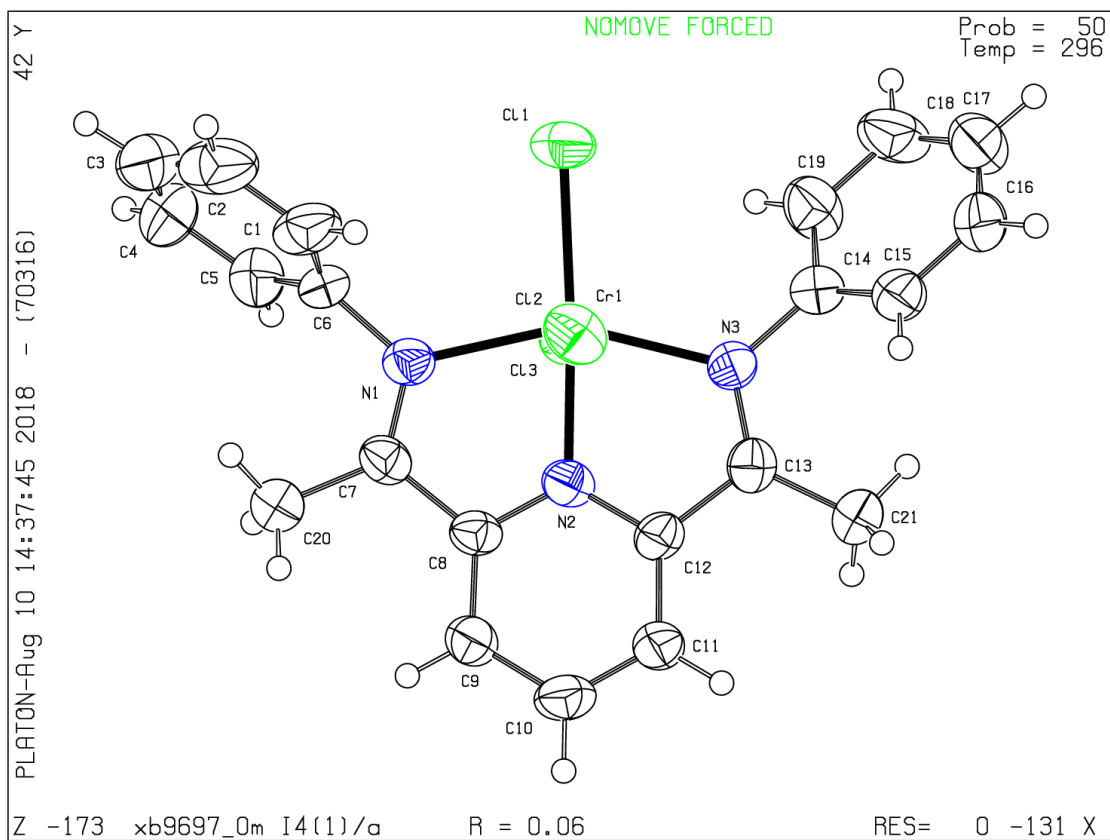

Supplement: s1 [file s1]
