# Supplementary material for: New Coordination Complexes Based on the 2,6-bis[1-(Phenylimino)ethyl] Pyridine Ligand: Effective Catalysts for the Synthesis of Propylene Carbonates from Carbon Dioxide and Epoxides
Source: MDPI journal article supplement (doi:10.3390/molecules23092304), 2018-09-10

# checkCIF/PLATON report

Structure factors have been supplied for datablock(s) xb9746\_0m

THIS REPORT IS FOR GUIDANCE ONLY. IF USED AS PART OF A REVIEW PROCEDURE FOR PUBLICATION, IT SHOULD NOT REPLACE THE EXPERTISE OF AN EXPERIENCED CRYSTALLOGRAPHIC REFEREE.

No syntax errors found.      CIF dictionary      Interpreting this report

## Datablock: xb9746\_0m

---

Bond precision:    C-C = 0.0136 A

Wavelength=0.71073

Cell:                a=8.988(3)                b=12.730(5)                c=20.143(7)  
                      alpha=80.318(8)        beta=79.252(7)        gamma=86.277(8)  
Temperature:        296 K

|                | Calculated                    | Reported                        |
|----------------|-------------------------------|---------------------------------|
| Volume         | 2230.7(14)                    | 2230.7(14)                      |
| Space group    | P -1                          | P -1                            |
| Hall group     | -P 1                          | -P 1                            |
| Moiety formula | 2(C21 H19 Cl2 Mn N3), C2 H3 N | C21 H19 Cl2 Mn N3, 0.5(C2 H3 N) |
| Sum formula    | C44 H41 Cl4 Mn2 N7            | C22 H20.50 Cl2 Mn N3.50         |
| Mr             | 919.52                        | 459.76                          |
| Dx,g cm-3      | 1.369                         | 1.369                           |
| Z              | 2                             | 4                               |
| Mu (mm-1)      | 0.845                         | 0.845                           |
| F000           | 944.0                         | 944.0                           |
| F000'          | 946.74                        |                                 |
| h,k,lmax       | 10,15,24                      | 10,15,24                        |
| Nref           | 7938                          | 7852                            |
| Tmin,Tmax      | 0.783,0.894                   | 0.573,0.745                     |
| Tmin'          | 0.770                         |                                 |

Correction method= # Reported T Limits: Tmin=0.573 Tmax=0.745

AbsCorr = MULTI-SCAN

Data completeness= 0.989

Theta(max)= 25.100

R(reflections)= 0.0807( 3202)

wR2(reflections)= 0.2245( 7852)

S = 0.951

Npar= 507

---

The following ALERTS were generated. Each ALERT has the format

**test-name\_ALERT\_alert-type\_alert-level.**

Click on the hyperlinks for more details of the test.

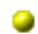

### Alert level C

|                   |                                                         |              |
|-------------------|---------------------------------------------------------|--------------|
| CRYSC01_ALERT_1_C | No recognised colour has been given for crystal colour. |              |
| PLAT018_ALERT_1_C | _diffrn_measured_fraction_theta_max .NE. *_full         | ! Check      |
| PLAT026_ALERT_3_C | Ratio Observed / Unique Reflections (too) Low ..        | 41% Check    |
| PLAT234_ALERT_4_C | Large Hirshfeld Difference C3 --C4                      | 0.17 Ang.    |
| PLAT234_ALERT_4_C | Large Hirshfeld Difference C20 --C21                    | 0.17 Ang.    |
| PLAT234_ALERT_4_C | Large Hirshfeld Difference C23 --C24                    | 0.16 Ang.    |
| PLAT244_ALERT_4_C | Low 'Solvent' Ueq as Compared to Neighbors of           | C44 Check    |
| PLAT331_ALERT_2_C | Small Average Phenyl C-C Dist C37 -C42                  | 1.37 Ang.    |
| PLAT341_ALERT_3_C | Low Bond Precision on C-C Bonds .....                   | 0.01359 Ang. |
| PLAT906_ALERT_3_C | Large K Value in the Analysis of Variance .....         | 11.882 Check |
| PLAT906_ALERT_3_C | Large K Value in the Analysis of Variance .....         | 2.587 Check  |
| PLAT911_ALERT_3_C | Missing FCF Refl Between Thmin & STh/L= 0.597           | 84 Report    |
| PLAT978_ALERT_2_C | Number C-C Bonds with Positive Residual Density.        | 0 Info       |

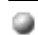

### Alert level G

|                   |                                                  |              |
|-------------------|--------------------------------------------------|--------------|
| PLAT002_ALERT_2_G | Number of Distance or Angle Restraints on AtSite | 2 Note       |
| PLAT003_ALERT_2_G | Number of Uiso or Uij Restrained non-H Atoms ... | 2 Report     |
| PLAT042_ALERT_1_G | Calc. and Reported MoietyFormula Strings Differ  | Please Check |
| PLAT045_ALERT_1_G | Calculated and Reported Z Differ by a Factor ... | 0.50 Check   |
| PLAT172_ALERT_4_G | The CIF-Embedded .res File Contains DFIX Records | 1 Report     |
| PLAT177_ALERT_4_G | The CIF-Embedded .res File Contains DELU Records | 1 Report     |
| PLAT380_ALERT_4_G | Incorrectly? Oriented X(sp2)-Methyl Moiety ..... | C29 Check    |
| PLAT794_ALERT_5_G | Tentative Bond Valency for Mn1 (II) .            | 2.16 Info    |
| PLAT794_ALERT_5_G | Tentative Bond Valency for Mn2 (II) .            | 2.20 Info    |
| PLAT860_ALERT_3_G | Number of Least-Squares Restraints .....         | 2 Note       |
| PLAT910_ALERT_3_G | Missing # of FCF Reflection(s) Below Theta(Min). | 3 Note       |
| PLAT933_ALERT_2_G | Number of OMIT Records in Embedded .res File ... | 6 Note       |

0 **ALERT level A** = Most likely a serious problem - resolve or explain  
0 **ALERT level B** = A potentially serious problem, consider carefully  
13 **ALERT level C** = Check. Ensure it is not caused by an omission or oversight  
12 **ALERT level G** = General information/check it is not something unexpected

4 ALERT type 1 CIF construction/syntax error, inconsistent or missing data  
5 ALERT type 2 Indicator that the structure model may be wrong or deficient  
7 ALERT type 3 Indicator that the structure quality may be low  
7 ALERT type 4 Improvement, methodology, query or suggestion  
2 ALERT type 5 Informative message, check

It is advisable to attempt to resolve as many as possible of the alerts in all categories. Often the minor alerts point to easily fixed oversights, errors and omissions in your CIF or refinement strategy, so attention to these fine details can be worthwhile. In order to resolve some of the more serious problems it may be necessary to carry out additional measurements or structure refinements. However, the purpose of your study may justify the reported deviations and the more serious of these should normally be commented upon in the discussion or experimental section of a paper or in the "special\_details" fields of the CIF. checkCIF was carefully designed to identify outliers and unusual parameters, but every test has its limitations and alerts that are not important in a particular case may appear. Conversely, the absence of alerts does not guarantee there are no aspects of the results needing attention. It is up to the individual to critically assess their own results and, if necessary, seek expert advice.

### **Publication of your CIF in IUCr journals**

A basic structural check has been run on your CIF. These basic checks will be run on all CIFs submitted for publication in IUCr journals (*Acta Crystallographica*, *Journal of Applied Crystallography*, *Journal of Synchrotron Radiation*); however, if you intend to submit to *Acta Crystallographica Section C* or *E* or *IUCrData*, you should make sure that full publication checks are run on the final version of your CIF prior to submission.

### **Publication of your CIF in other journals**

Please refer to the *Notes for Authors* of the relevant journal for any special instructions relating to CIF submission.

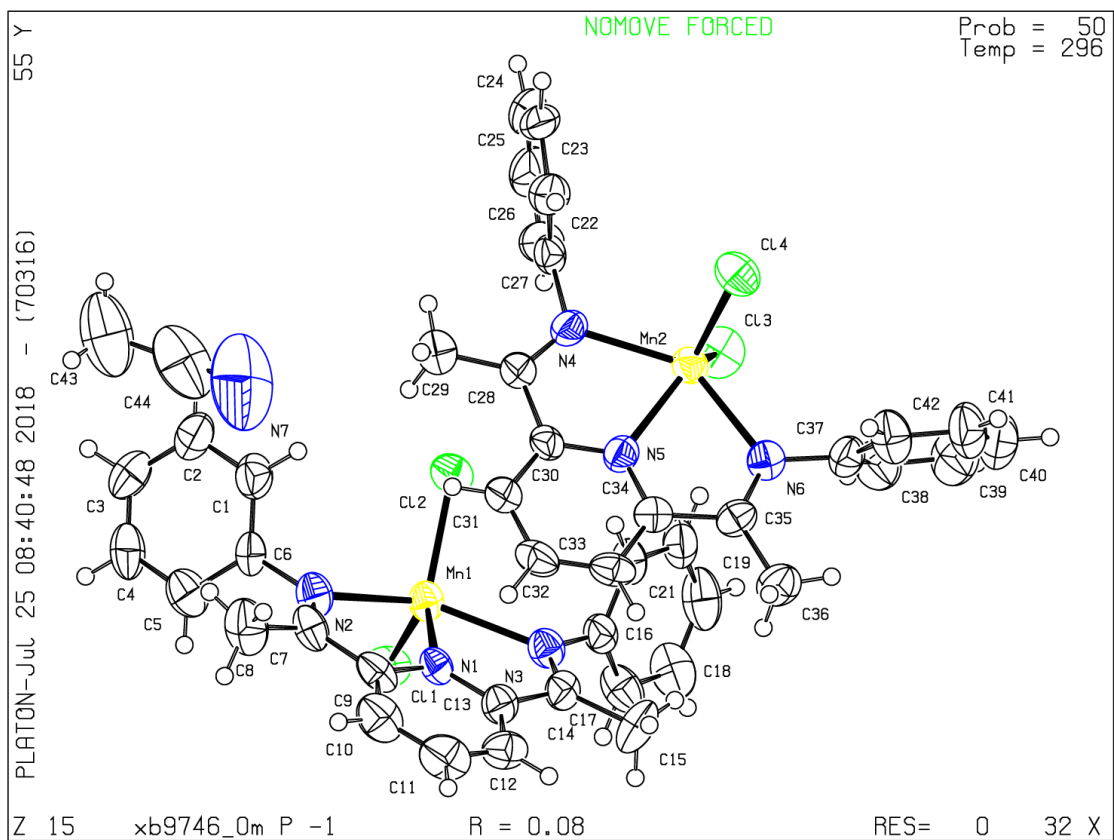

Supplement: s1 [file s1]
